# Supplementary material for: Theoretical insights into nitrogen fixation on Ti2C and Ti2CO2 in a lithium–nitrogen battery
Source: Royal Society of Chemistry journal article supplement (doi:10.1039/c9ta06232g), 2019-01-01
Supplement: c9ta06232g1.pdf [file c9ta06232g1.pdf]

Supporting Information for:

**Theoretical Insights into Nitrogen Fixation on  $\text{Ti}_2\text{C}$  and  
 $\text{Ti}_2\text{CO}_2$  in a Lithium-Nitrogen Battery**

Shuaiyu Yi<sup>a</sup>, Guangdong Liu<sup>a</sup>, Zhixiao Liu<sup>b,\*</sup>, Wangyu Hu<sup>b</sup>, Huiqiu Deng<sup>a,\*</sup>

<sup>a</sup>School of Physics and Electronics, <sup>b</sup>College of Materials Science and Engineering,  
Hunan University, Changsha 410082, China

---

\* Corresponding author: [hqdeng@hnu.edu.cn](mailto:hqdeng@hnu.edu.cn) (H. Deng); [zxliu@hnu.edu.cn](mailto:zxliu@hnu.edu.cn) (Z. Liu)

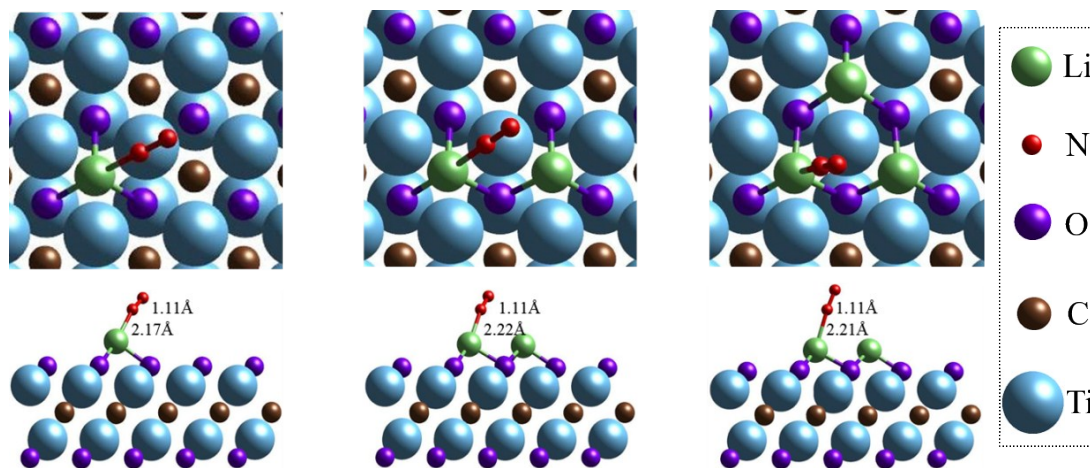

**Figure S1** Schematic top- and side-view of optimized configurations of  $x\text{Li}+\text{N}_2$  adsorption on  $\text{Ti}_2\text{CO}_2$ , and  $x=1-3$ .  $\text{N}_2$  molecule is adsorbed with end-on model and unable to interact with each Li atoms simultaneously. Besides, the closest distance between Li and N atoms is  $\sim 2.2 \text{ \AA}$  and  $\text{N}\equiv\text{N}$  is constantly  $1.11 \text{ \AA}$  equal to  $\text{N}_2$  in gas, indicating the weak interaction.

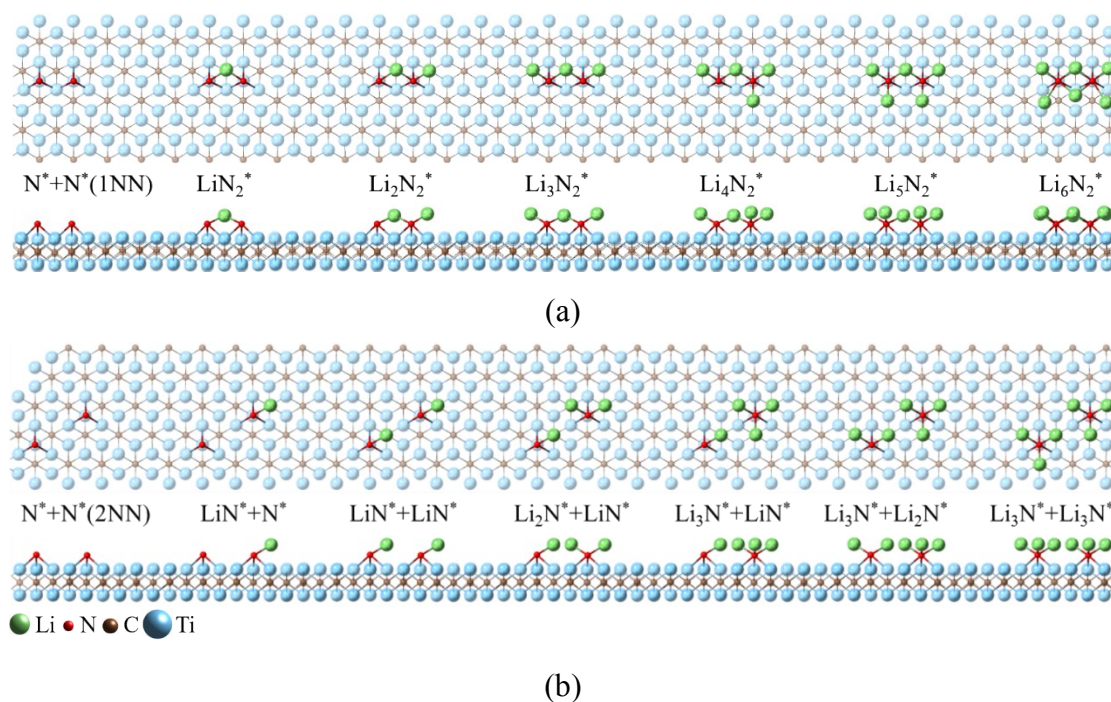

**Figure S2** Schematic diagrams for two pathways of  $\text{N}_2$  reduction reaction on  $\text{Ti}_2\text{C}$ , which start with N atoms located (a) at 1NN sites and (b) at 2NN sites. The red sphere represents N and green sphere represents Li.

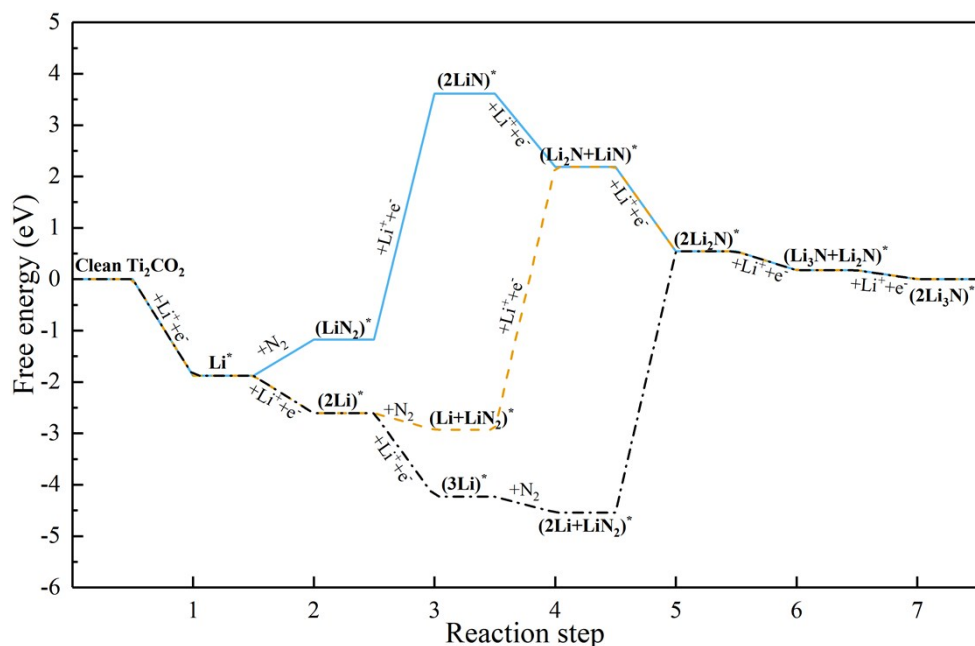

**Figure S3** Calculated energy profiles for the formation of  $(2\text{Li}_3\text{N})^*$  on  $\text{Ti}_2\text{CO}_2$  under the equilibrium potentials. There are three pathways in consideration that one, two or three Li atoms are pre-adsorbed before  $\text{N}_2$  adsorbed on  $\text{Ti}_2\text{CO}_2$ . The equilibrium potential is 0.21 V, and the corresponding calculated discharge overpotentials are tabulated in Table S4.

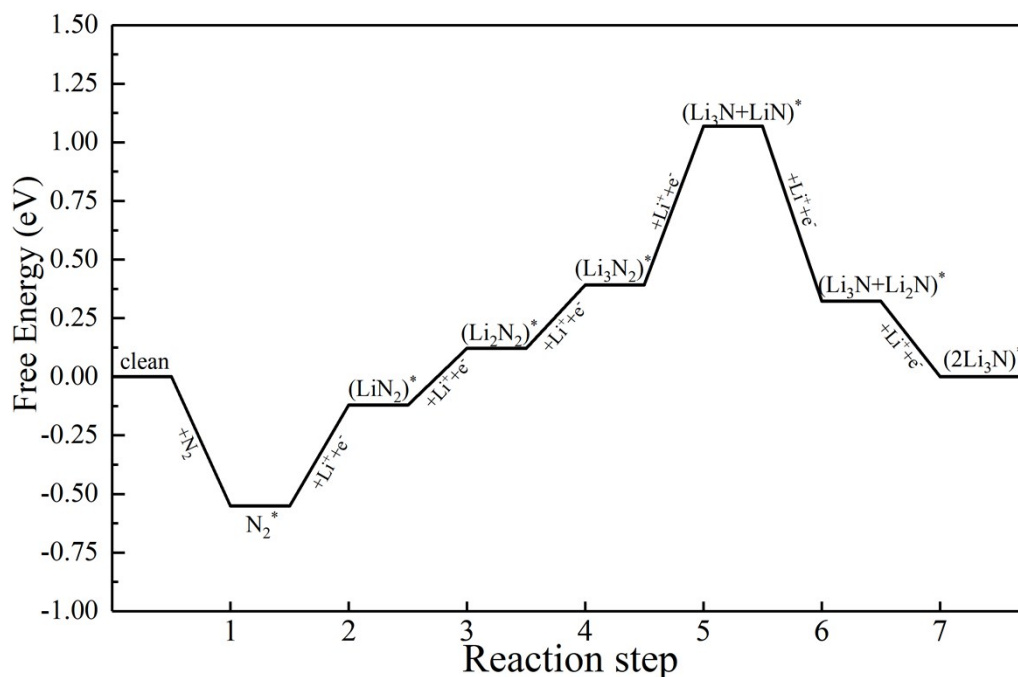

**Figure S4** Calculated energy profiles for the formation of  $(2\text{Li}_3\text{N})^*$  on  $\text{Ti}_2\text{CO}_2\text{Li}_2$  (already lithiated  $\text{Ti}_2\text{CO}_2$ ) under the equilibrium potential. The equilibrium potential is 0.31 V. The step 5 and step 6 are controlling steps for discharge and charge respectively, and discharge and charge overpotentials are 0.68 V and 0.75 V.

**Table S1 Adsorption energy (in eV) of N<sub>2</sub> molecule, N atom and Li atom adsorbed on the Ti<sub>2</sub>C monolayer.**

| On Ti <sub>2</sub> C | N <sub>2</sub> |         | N     | Li    |
|----------------------|----------------|---------|-------|-------|
|                      | end-on         | side-on |       |       |
| fcc                  | -1.09          | -3.52   | -2.63 | -0.91 |
| hcp                  | -0.88          | -3.52   | -2.44 | -0.90 |
| atop                 | -0.85          | -3.52   | +0.52 | -0.88 |

**Table S2 Adsorption energy (in eV) of N<sub>2</sub> molecule, N atom and Li atom adsorbed on the Ti<sub>2</sub>CO<sub>2</sub> monolayer.**

| On Ti <sub>2</sub> CO <sub>2</sub> | N <sub>2</sub> |         | N            | Li    |
|------------------------------------|----------------|---------|--------------|-------|
|                                    | end-on         | side-on |              |       |
| On Ti                              | -0.12          | -0.14   | +6.22(+1.02) | -1.99 |
| On C                               | -0.12          | -0.15   | +7.69(+2.49) | -2.17 |
| On O                               | -0.09          | -0.13   | +4.72(-0.48) | -1.63 |

**Table S3 Equilibrium potential (U<sub>e</sub>), controlling steps for discharge (Step D), overpotentials for Li-pre-adsorption discharge (η<sub>discharge</sub>) on Ti<sub>2</sub>CO<sub>2</sub> substrate.<sup>a</sup>**

| Pathway                    | One Li          | Two Li          | Three Li        |
|----------------------------|-----------------|-----------------|-----------------|
|                            | Pre-adsorption  | Pre-adsorption  | Pre-adsorption  |
| U <sub>e</sub> (V)         |                 | 0.21            |                 |
| Step D                     | 3 <sup>rd</sup> | 4 <sup>th</sup> | 5 <sup>th</sup> |
| η <sub>discharge</sub> (V) | 4.79            | 5.12            | 5.08            |

<sup>a</sup> as shown in Fig. S3, the controlling steps represent the dissociation of N<sub>2</sub> and N atom adsorption on Ti<sub>2</sub>CO<sub>2</sub> substrate, however, the dissociation energy is high and the adsorption is unfavorable on Ti<sub>2</sub>CO<sub>2</sub> which result in ultrahigh overpotentials.

**Table S4 Adsorption energy (in eV) of N<sub>2</sub> molecule and Li atom adsorbed on the Ti<sub>2</sub>CO<sub>2</sub>Li<sub>2</sub> (already lithiated Ti<sub>2</sub>CO<sub>2</sub>) monolayer.**

| On Ti <sub>2</sub> CO <sub>2</sub> Li <sub>2</sub> | N <sub>2</sub> |         | N     | Li    |
|----------------------------------------------------|----------------|---------|-------|-------|
|                                                    | end-on         | side-on |       |       |
| On Li                                              | -0.51          | -0.53   | +2.20 | +0.27 |
| On O                                               | -0.37          | -0.50   | +2.20 | +0.27 |
| On Ti                                              | -0.47          | -0.55   | +2.30 | +0.27 |
